# Supplementary material
Source: PubMed Central journal article supplement (PMC5830663)
Supplement: rsbl20170709supp1.pdf [file rsbl20170709supp1.pdf]

## **Supplementary materials for:**

### **Social cues trigger differential immune investment strategies in a non-social insect, *Tenebrio molitor***

**Joe D. Gallagher, Michael T. Siva-Jothy, and Sophie E.F. Evison**

Supplementary methods are described below in sections S1-S4. Supplementary data, including full model outputs, are described below in sections S5 and S6.

#### **Supplementary methods**

##### **S1. Bacterial preparation and preliminary dose response survival analyses**

As a pathogen challenge, we used erythromycin-resistant *Staphylococcus aureus* (strain SH1000). This is a Gram-positive bacterium found in tenebrionid food stores [1] which causes persistent infection and induces an immune response in *T. molitor* that extends over the 72 h cohabitation period [2] used in our experimental design (described in section S2). In order to provide a non-pathogenic immune elicitor, bacterial heat-killing was performed by heating inoculates in a water bath at 95°C for 30 mins. Efficacy of the heat-killing treatment was confirmed by plating onto standard agar and incubating at 37°C for 24 hours, which yielded zero colonies in total (n = 6).

A survival analysis estimated an LD<sub>50</sub> after 14 days at  $5.33 \times 10^7$  colony forming units (CFUs). The effect of food availability on survival in bacterially-infected groups was significant (Cox proportional hazards: HR = 1.64, WS = 9.23, N = 178, d.f. = 1, P = 0.002; Fig. S1).

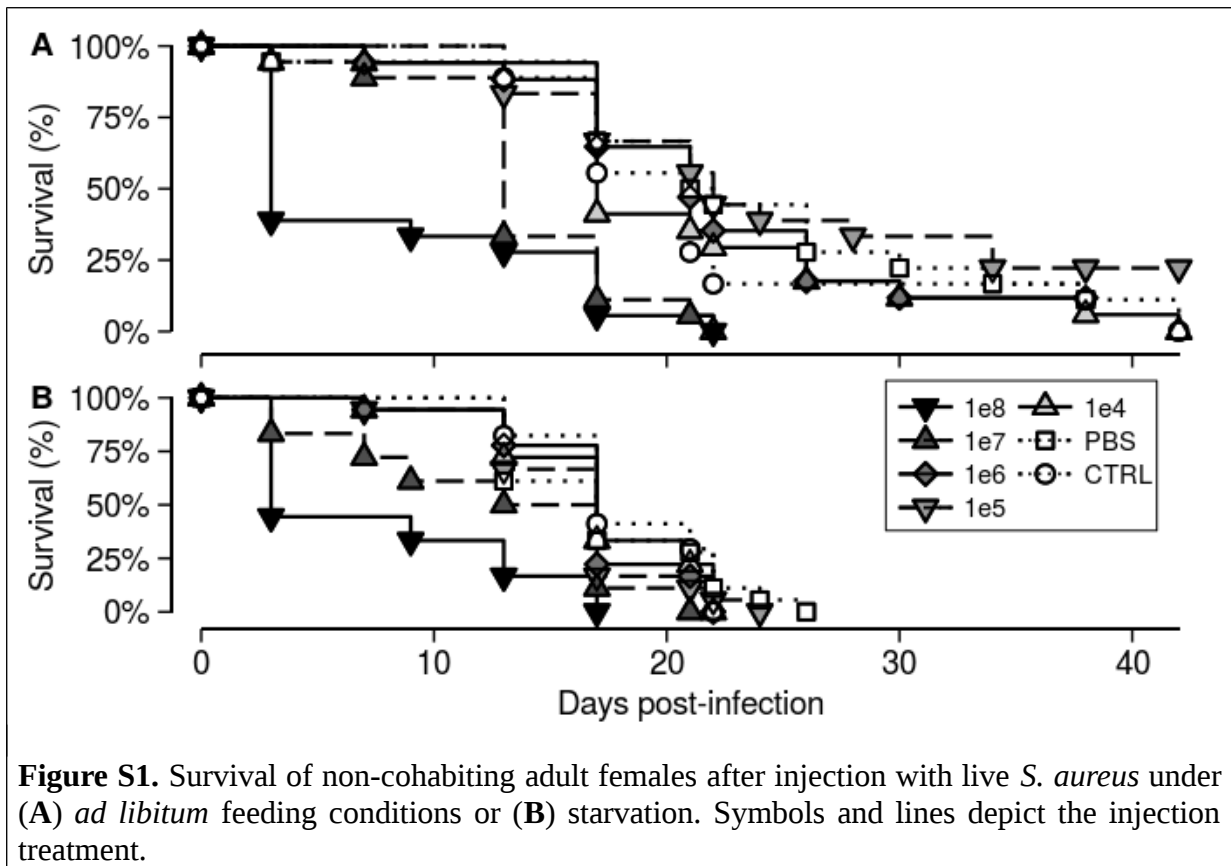

Cohabitants in Experiment 1 (fig. S2a) were injected with  $2.5 \times 10^4$  CFUs of both live and heat-killed bacteria to ensure that doses were matched, and that they induced a sub-lethal immune response. Focal beetles assayed for antibacterial activity by the haemolymph in Experiment 1 (fig. S2a) were injected with a higher dose of  $2.5 \times 10^6$  CFUs live bacteria to ensure that variation in bacterial clearance by the host could be detected. Similarly, focal beetles assayed for survival were injected with the LD<sub>50</sub> dose of  $5 \times 10^7$  CFUs in Experiment 2 (fig. S2b); as we were only using heat-killed bacteria, we could afford to use the higher dose of  $2.5 \times 10^6$  CFUs for both cohabitant and focal beetle treatment. This dose was chosen to ensure effective immune stimulation in beetles whilst also limiting impacts on survival, as we were primarily interested in egg production as opposed to survival after infection.

## S2. Cohabitant treatment design

Pairs of female beetles were housed together in Petri dishes (50 mm) for 72 h with *ad libitum* access to food and water. Each pair consisted of a naive focal and treated cohabitant, with the cohabitants from Experiment 1 receiving the treatment regime depicted in fig. S2a, and the cohabitants from Experiment 2 receiving the treatment regime depicted in fig. S2b. After 72 h, focal beetles were removed from their pairs and randomly assigned to the sub-treatments specifically designed to test the effect of social immunisation on their resistance and tolerance (Experiment 1, fig. S2a) or fitness (Experiment 2, fig. S2b) traits.

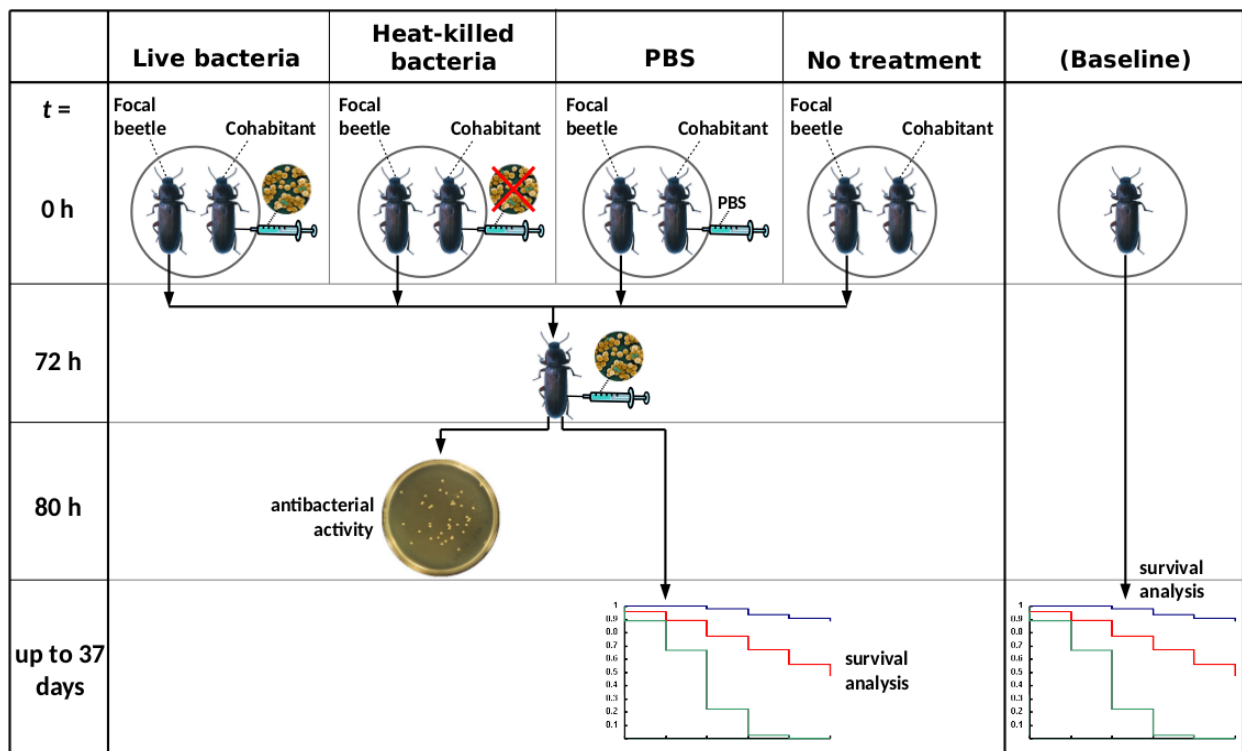

**Figure S2a.** Experimental design for Experiment 1. Pairs of female beetles were housed together in Petri dishes (diameter 50 mm) for 72 h with *ad libitum* access to food and water. Cohabitants received one of the following treatments:  $2.5 \times 10^4$  CFUs of either (i) live or (ii) heat-killed bacteria suspended in 5  $\mu$ L sterile PBS, (iii) 5  $\mu$ L sterile PBS as a wounding control, or (iv) no treatment. After 72 h, focal beetles were removed from their pairs and randomly assigned to one of two sub-treatments to measure *in vivo* antibacterial activity (n=76) or survival (n=126) in response to infection. A baseline group (n=32) of untreated, non-cohabiting individuals from the same cohort were maintained as a procedural control.

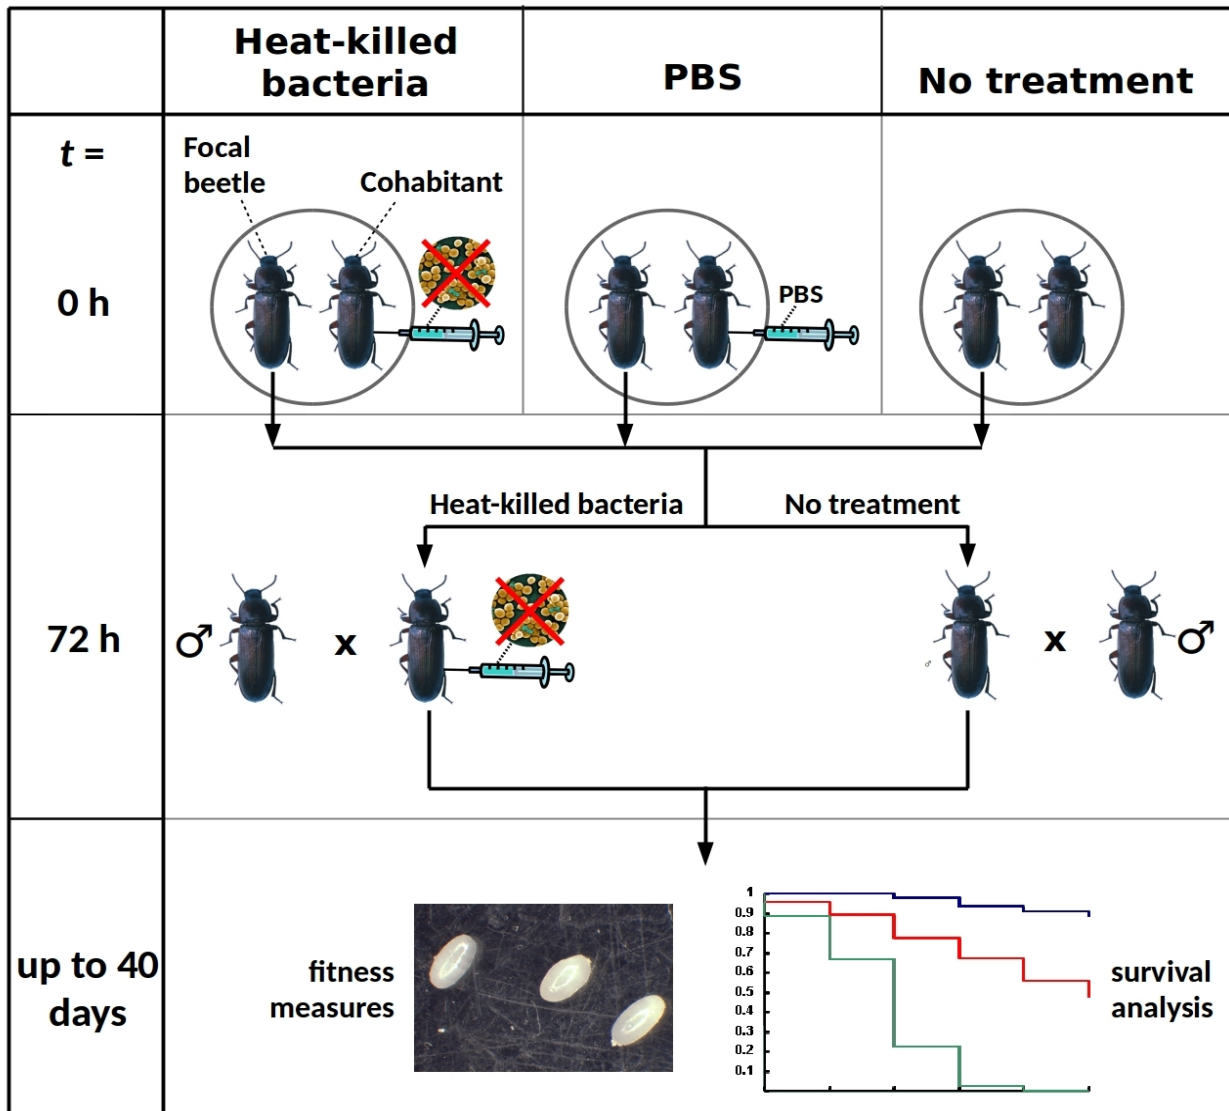

**Figure S2b.** Experimental design for Experiment 2. Pairs of beetles were housed as in Experiment 1, but cohabitants received one of the following treatments: (i) injection with  $2.5 \times 10^6$  CFUs heat-killed bacteria, (ii) injection with 5  $\mu$ L sterile PBS, or (iii) no treatment. After 72 h cohabitation, focal beetles were randomly assigned to one of two sub-treatments; one half ( $n = 224$ ) received the same challenge as the heat-killed bacteria-challenged cohabitants, whilst the other half ( $n = 224$ ) remained unchallenged. All focal beetles were then mated with an age-matched, unchallenged, virgin male for 24 h before being kept in isolation with *ad libitum* food and water for the next 40 days to monitor survival and take fitness measurements (egg count, egg volume).

### **S3. Bacterial clearance assay**

Perfused haemolymph samples from the focal beetles were serially diluted up to  $10^{-4}$  in sterile PBS, and 200  $\mu\text{L}$  of each dilution was plated out onto erythromycin-infused agar ( $10 \mu\text{g mL}^{-1}$  erythromycin and  $5.6 \mu\text{g mL}^{-1}$  amphotericin-B) to selectively grow and recover only the erythromycin-resistant *S. aureus*. Plates were incubated at  $37^\circ\text{C}$  for 48 h and CFUs enumerated using OpenCFU [3]; plates with 10-100 CFUs were preferentially used to calculate total residual bacterial load. 99.5% *Staphylococcus aureus* are cleared within 1 h of injection [2] but induced antimicrobial activity is only detected after 6 h and peaks after around 4 days [2]. We perfusion bled (see [4]) focal beetles at 8 h post-infection as there is strong transcription at this time [5] and long-lasting immune defence has been induced at this point [2].

#### S4. Egg volume calculation

To estimate egg size, three eggs were randomly sampled from each egg count taken from focal beetles, and digitally photographed against a dark background using a MicroPublisher 3.3 RTV camera (QImaging, Burnaby, BC, Canada) attached to a Leica dissecting stereoscope (Wetzlar, Hessen, Germany). An automated image analysis script was developed in C++ using the open-source image analysis library, OpenCV (<http://opencv.willowgarage.com>) and is available online (<https://github.com/JoGall/egg-size>). In short, the script: (a) converted each image to greyscale, (b) blurred, (c) adaptive thresholded to identify foreground, (d) identified the three largest contours, (e) fitted a minimum rotated rectangle fitted to each contour, (g) returned the length and width of each rotated rectangle as an estimate of egg length and width, (h) outputted the resulting image mask for validation (fig. S4). Estimates of egg length and width were scaled to true spatial units (mm) using a calibration image. Volume was estimated using the following formula for the area of a regular ellipsoid, where  $a$  = egg length and  $b$  = egg width / 2 (see [6]):

$$V = \frac{4}{3} \cdot \pi \cdot a \cdot b^2$$

Tenebrionid eggs are covered by a sticky exochorion to which flour particles often adhere [7]; in some cases, this resulted in overestimation of egg length and width due to surrounding flour being identified as part of the egg. Image masks were therefore reviewed and in such instances the raw images edited manually by highlighting problematic areas in black to mark them as background. This resulted in measures of egg length and width which more closely matched estimates by human observers. The reliability of our image analysis method was assessed by comparing with measurements from two human observers across a sample of six images (18 eggs). Automated estimates of egg length and width differed on average by 3.7% and 3.4% (respectively) from one human observer, and by 2.7% and 3.5% from the other.

This is comparable to the difference between the two human observers, where egg length and width differed on average by 2.0% and 3.3%.

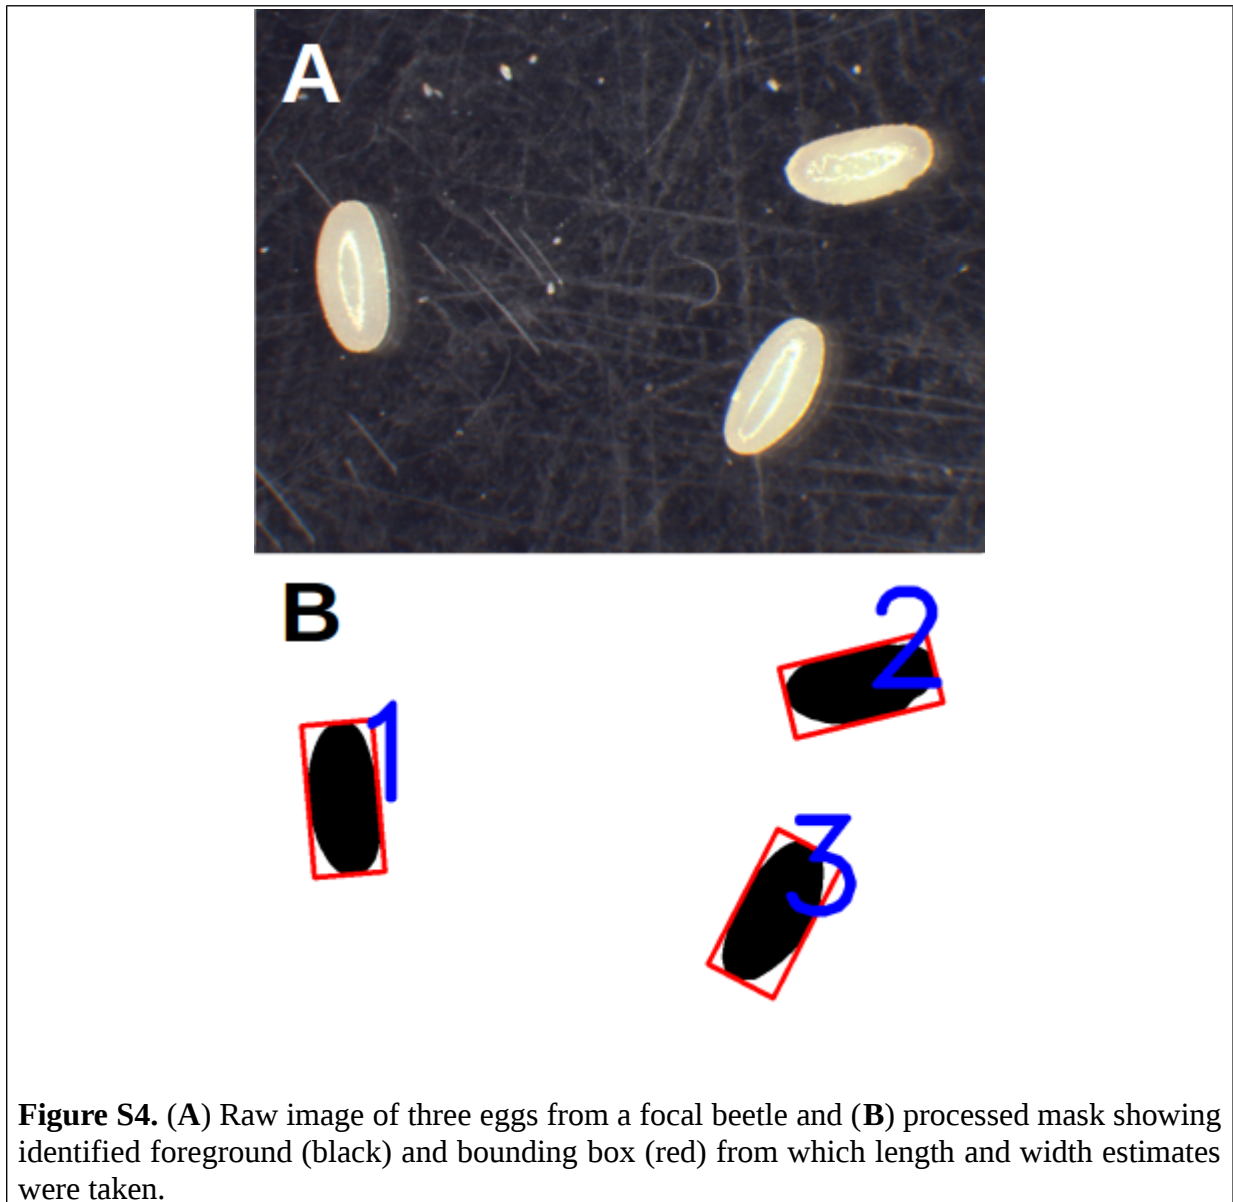

Egg volume was measured only when three or more eggs had been laid per beetle per count, meaning that the data set was truncated. However, the level of data truncation between treatments is minimal and even, and the number of data points that egg volume measurements were made on remains large (Table S4.1).

**Table S4.1.** Data collected during fitness measurements to show extent of data truncation before image processing.

| <b>Treatment</b>            | <b>Total # eggs</b> | <b>Total # egg counts</b> | <b># egg counts with &lt; 3 eggs</b> | <b>% data truncation</b> |
|-----------------------------|---------------------|---------------------------|--------------------------------------|--------------------------|
| Heat-killed / Heat-killed   | 613                 | 82                        | 24                                   | 29                       |
| Heat-killed / No treatment  | 1065                | 130                       | 37                                   | 28                       |
| PBS / Heat-killed           | 433                 | 70                        | 30                                   | 43                       |
| PBS / No treatment          | 907                 | 96                        | 13                                   | 13                       |
| No treatment / Heat-killed  | 732                 | 105                       | 33                                   | 31                       |
| No treatment / No treatment | 985                 | 117                       | 31                                   | 27                       |



## Supplementary data

### S5. Full outputs from statistical analyses

#### Experiment 1 (S5.1 – S5.6)

**Table S5.1.** Model output from negative binomial regression fitted to antibacterial activity data from focal beetles from Experiment 1. Treatment refers to non-focal beetle treatment and weight refers to focal beetle pupal weight.

| Variable  | d.f. | F value | P-value |
|-----------|------|---------|---------|
| Treatment | 3    | 1.413   | 0.246   |
| Weight    | 1    | 4.414   | 0.039 * |

**Table S5.2.** Multiple comparison output using Tukey's HSD from negative binomial regression fitted to antibacterial activity data from focal beetles from Experiment 1, including weight as a covariate.

| Comparison                           | z value | P-value |
|--------------------------------------|---------|---------|
| Heat-killed bacteria – No treatment  | 0.395   | 0.979   |
| Live bacteria – No treatment         | -0.402  | 0.978   |
| PBS – No treatment                   | 0.298   | 0.991   |
| Live bacteria – Heat-killed bacteria | -0.813  | 0.848   |
| PBS – Heat-killed bacteria           | -0.078  | 1.000   |
| PBS – Live bacteria                  | 0.698   | 0.898   |

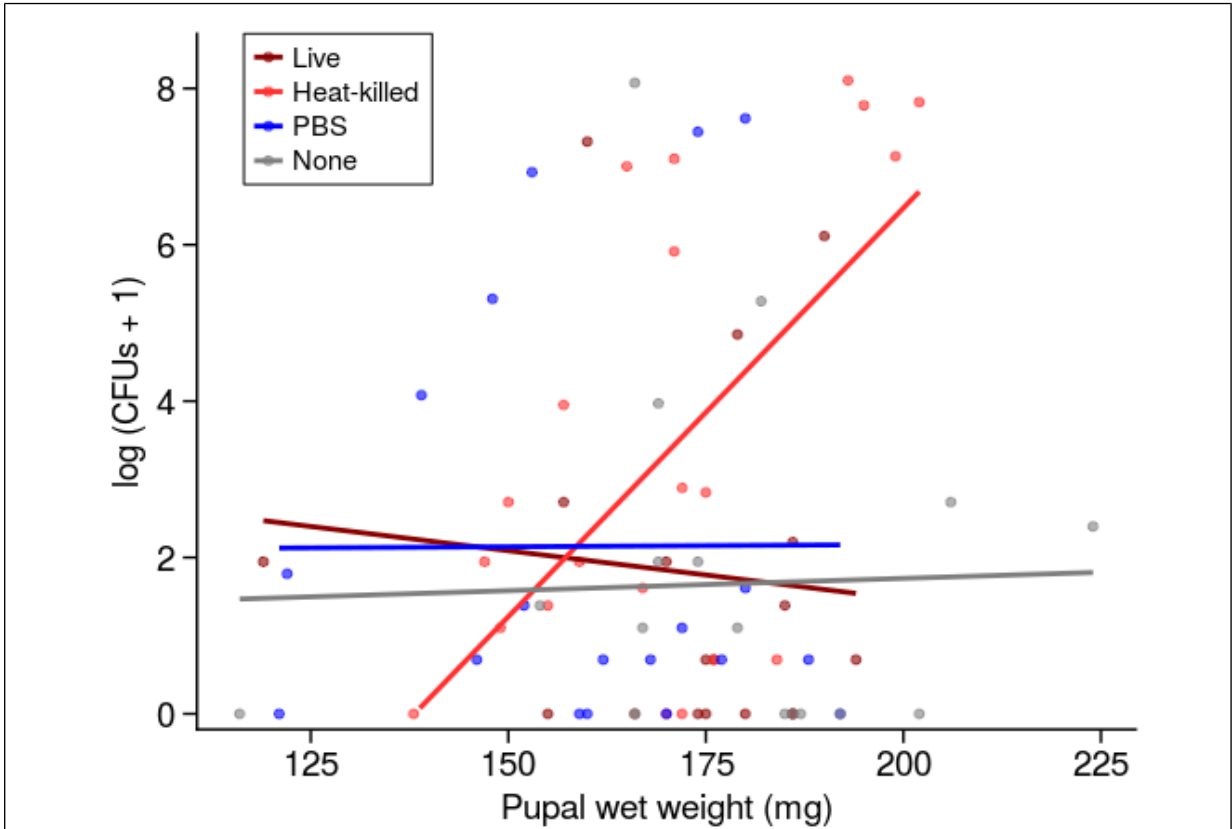

**Figure S5.3.** Importance of pupal weight in explaining cohabitant beetle treatment effect on antibacterial activity (as measured by the number of *Staphylococcus aureus* colony forming units [CFUs] recovered from their haemolymph 8 h post-infection). Line colour denotes cohabitant treatment.

**Table S5.4.** Model output from Cox proportional hazards model fitted to data from focal beetles from Experiment 1. Treatment refers to non-focal beetle treatment and weight refers to focal beetle pupal weight.

| Variable  | d.f.  | Chisq value | P-value |
|-----------|-------|-------------|---------|
| Treatment | 3, 71 | 10.488      | 0.015 * |
| Weight    | 1, 71 | 3.075       | 0.080   |

**Table S5.5.** Survival parameters for focal beetles from Experiment 1 by treatment (survival time in days [mean  $\pm$  S.E.] and Cox proportional hazard [CPH] ratios [mean  $\pm$  S.E.] vs. comparison treatment group). CPH regressions showed a significant effect of post-cohabitation challenge on survival (treatment groups vs. baseline: LR = 106.0; d.f. = 4,158;  $p < 0.001$ ), and a significant effect of cohabitant treatment on survival among (non-baseline) treatment groups (LR = 10.5; d.f. = 3,126;  $p = 0.015$ ).

| Parameter           | Cohabitant treatment |                 |                 |                 |                    |
|---------------------|----------------------|-----------------|-----------------|-----------------|--------------------|
|                     | Live                 | Heat-killed     | PBS             | None            | (Baseline)         |
| Survival time       | 7.7 $\pm$ 1.5        | 11.8 $\pm$ 1.8  | 15.7 $\pm$ 2.7  | 13.8 $\pm$ 2.3  | 35.69 $\pm$ 1.09 † |
| CPH vs. None        | 1.84 $\pm$ 0.26 *    | 1.27 $\pm$ 0.26 | 0.77 $\pm$ 0.28 | -               | -                  |
| CPH vs. PBS         | 2.37 $\pm$ 0.28 **   | 1.64 $\pm$ 0.28 | -               | 1.29 $\pm$ 0.28 | -                  |
| CPH vs. Heat-killed | 1.45 $\pm$ 0.25      | -               | 0.61 $\pm$ 0.28 | 0.79 $\pm$ 0.26 | -                  |
| CPH vs. Live        | -                    | 0.69 $\pm$ 0.25 | 0.42 $\pm$ 0.28 | 0.55 $\pm$ 0.26 | -                  |
| CPH vs. (Baseline)  | 68.4 $\pm$ 0.74      | 47.4 $\pm$ 0.74 | 29.9 $\pm$ 0.74 | 37.5 $\pm$ 0.74 | -                  |

\*  $p = 0.09$ ; \*\*  $p = 0.01$

† Longevity for right-censored data incorporated as 37 days for the purpose of calculating mean survival time

**Table S5.6.** Multiple comparison output using Tukey's HSD Cox proportional hazards model fitted to data from focal beetles from Experiment 1, excluding weight as a covariate.

| Comparison                           | z value | P-value   |
|--------------------------------------|---------|-----------|
| Heat-killed bacteria – No treatment  | 0.902   | 0.804     |
| Live bacteria – No treatment         | 2.326   | 0.092     |
| PBS – No treatment                   | -0.935  | 0.786     |
| Live bacteria – Heat-killed bacteria | -0.935  | 0.456     |
| PBS – Heat-killed bacteria           | -1.776  | 0.285     |
| PBS – Live bacteria                  | -3.115  | 0.0096 ** |

## Experiment 2 (S5.7 – S5.13)

**Table S5.7.** Model output from linear regression fitted to egg-laying rate data from Experiment 2. Cohabitant and Focal refers to treatment category applied to relevant beetles, weight refers to beetle pupal weight.

| Variable         | d.f.   | F value | P-value     |
|------------------|--------|---------|-------------|
| Cohabitant       | 2, 218 | 0.066   | 0.936       |
| Focal            | 1, 218 | 14.131  | < 0.001 *** |
| Weight           | 1, 218 | 0.721   | 0.397       |
| Cohabitant*Focal | 2, 218 | 2.332   | 0.099       |

**Table S5.8.** Multiple comparison output using Tukey's HSD linear regression fitted to egg-laying rate data from Experiment 2, excluding weight as a covariate.

| Comparison (cohabitant/focal)                        | t value | P-value  |
|------------------------------------------------------|---------|----------|
| No treatment/Heat-killed – Heat-killed/Heat-killed   | 0.374   | 0.999    |
| PBS/Heat-killed – Heat-killed/Heat-killed            | -0.935  | 0.937    |
| Heat-killed/No treatment – Heat-killed/Heat-killed   | 1.995   | 0.348    |
| No treatment/No treatment – Heat-killed/Heat-killed  | 1.175   | 0.848    |
| PBS/No treatment – Heat-killed/Heat-killed           | 2.853   | 0.053    |
| PBS/Heat-killed – No treatment/Heat-killed           | -1.318  | 0.775    |
| Heat-killed/No treatment – No treatment/Heat-killed  | 1.648   | 0.568    |
| No treatment/No treatment – No treatment/Heat-killed | 0.812   | 0.965    |
| PBS/No treatment – No treatment/Heat-killed          | 2.519   | 0.123    |
| Heat-killed/No treatment – PBS/Heat-killed           | 2.916   | 0.045 *  |
| No treatment/No treatment – PBS/Heat-killed          | 2.113   | 0.284    |
| PBS/No treatment – PBS/Heat-killed                   | 3.762   | 0.003 ** |
| No treatment/No treatment – Heat-killed/No treatment | -0.846  | 0.958    |
| PBS/No treatment – Heat-killed/No treatment          | 0.872   | 0.953    |
| PBS/No treatment – No treatment/No treatment         | 1.723   | 0.518    |

**Table S5.9.** Model output from linear mixed effects model fitted to egg volume data from Experiment 2. Cohabitant and Focal refers to treatment category applied to relevant beetles, weight refers to beetle pupal weight.

| Variable         | d.f.   | F value | P-value    |
|------------------|--------|---------|------------|
| Cohabitant       | 2, 416 | 3.928   | 0.020 *    |
| Focal            | 1, 416 | 17.601  | <0.001 *** |
| Weight           | 1, 416 | 4.364   | 0.003 **   |
| Cohabitant*Focal | 2, 416 | 11.431  | <0.001 *** |

**Table S5.10.** Multiple comparison output using Tukey's HSD linear mixed effects model fitted to egg volume data from Experiment 2, including weight as a covariate.

| Comparison (cohabitant/focal)                        | z value | P-value    |
|------------------------------------------------------|---------|------------|
| No treatment/Heat-killed – Heat-killed/Heat-killed   | 2.321   | 0.183      |
| PBS/Heat-killed – Heat-killed/Heat-killed            | 1.855   | 0.426      |
| Heat-killed/No treatment – Heat-killed/Heat-killed   | 6.278   | <0.001 *** |
| No treatment/No treatment – Heat-killed/Heat-killed  | 3.855   | 0.002 **   |
| PBS/No treatment – Heat-killed/Heat-killed           | 1.632   | 0.573      |
| PBS/Heat-killed – No treatment/Heat-killed           | -0.176  | 0.999      |
| Heat-killed/No treatment – No treatment/Heat-killed  | 3.959   | 0.001 **   |
| No treatment/No treatment – No treatment/Heat-killed | 0.464   | 0.684      |
| PBS/No treatment – No treatment/Heat-killed          | -0.812  | 0.965      |
| Heat-killed/No treatment – PBS/Heat-killed           | 3.515   | 0.006 **   |
| No treatment/No treatment – PBS/Heat-killed          | 1.426   | 0.708      |
| PBS/No treatment – PBS/Heat-killed                   | -0.512  | 0.996      |
| No treatment/No treatment – Heat-killed/No treatment | -2.662  | 0.082      |
| PBS/No treatment – Heat-killed/No treatment          | -5.081  | <0.001 *** |
| PBS/No treatment – No treatment/No treatment         | -2.427  | 0.145      |

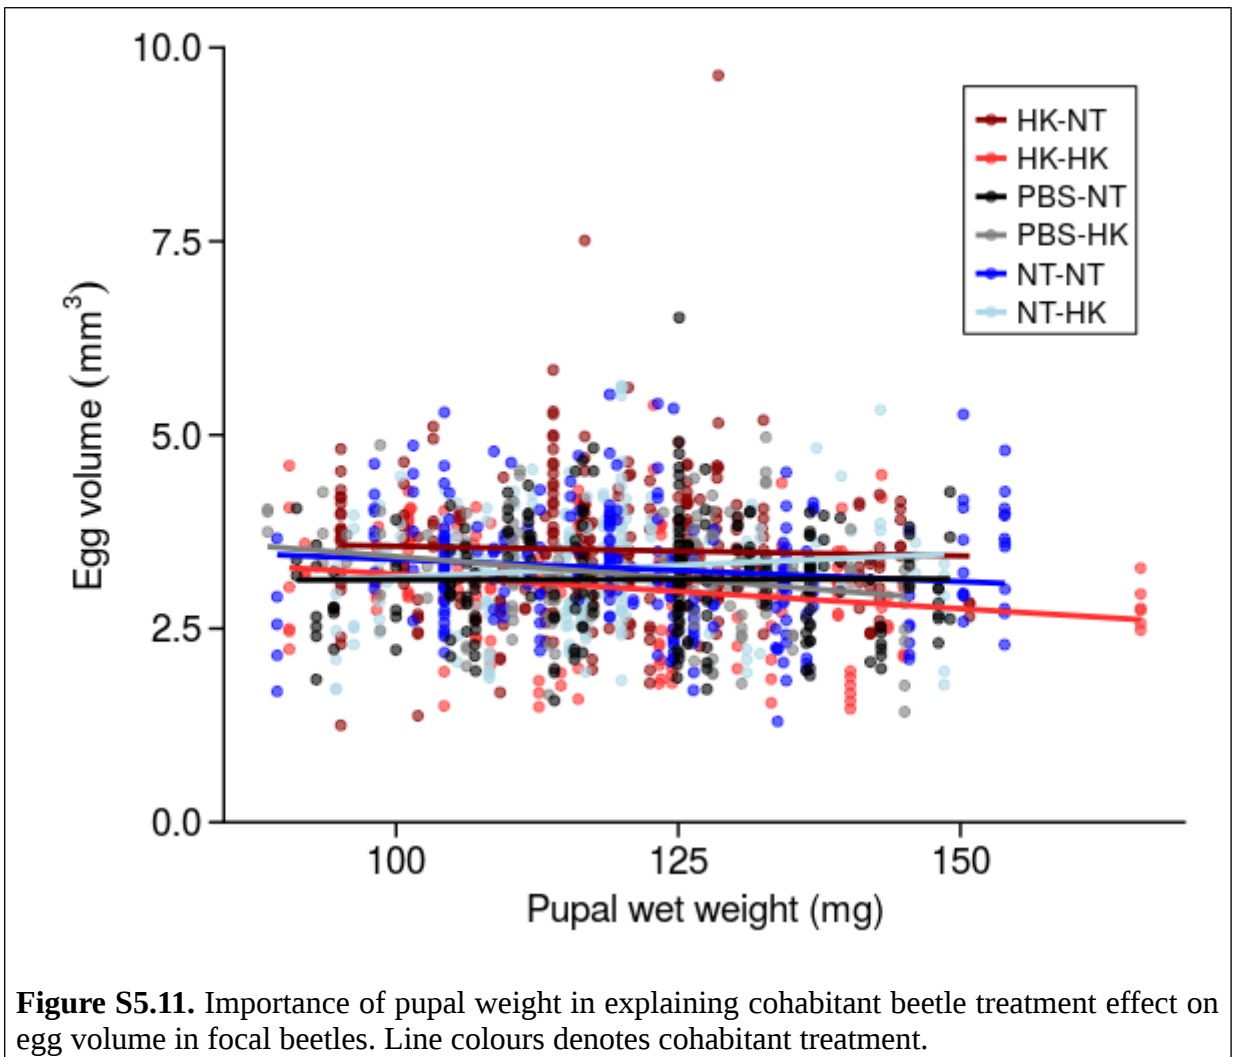

**Table S5.12.** Survival parameters for focal beetles from Experiment 1 by treatment (survival time in days [mean  $\pm$  S.E.] and Cox proportional hazard [CPH] ratios [mean  $\pm$  S.E.] vs. comparison treatment group). Cox proportional hazard regression failed to show a significant effect of nonfocal beetle treatment (LR = 7.34; d.f. = 5,224; p = 0.197).

|               | Cohabitant treatment – Focal treatment |                 |                 |                 |                 |                 |
|---------------|----------------------------------------|-----------------|-----------------|-----------------|-----------------|-----------------|
| Parameter     | NT-NT                                  | NT-HK           | PBS-NT          | PBS-HK          | HK-NT           | HK-HK           |
| Survival time | 18.2 $\pm$ 0.9                         | 16.5 $\pm$ 0.9  | 15.4 $\pm$ 1.1  | 15.2 $\pm$ 0.61 | 17.8 $\pm$ 1.2  | 15.3 $\pm$ 0.9  |
| CPH           | -                                      | 1.38 $\pm$ 0.23 | 1.53 $\pm$ 0.24 | 1.66 $\pm$ 0.24 | 1.10 $\pm$ 0.24 | 1.53 $\pm$ 0.24 |

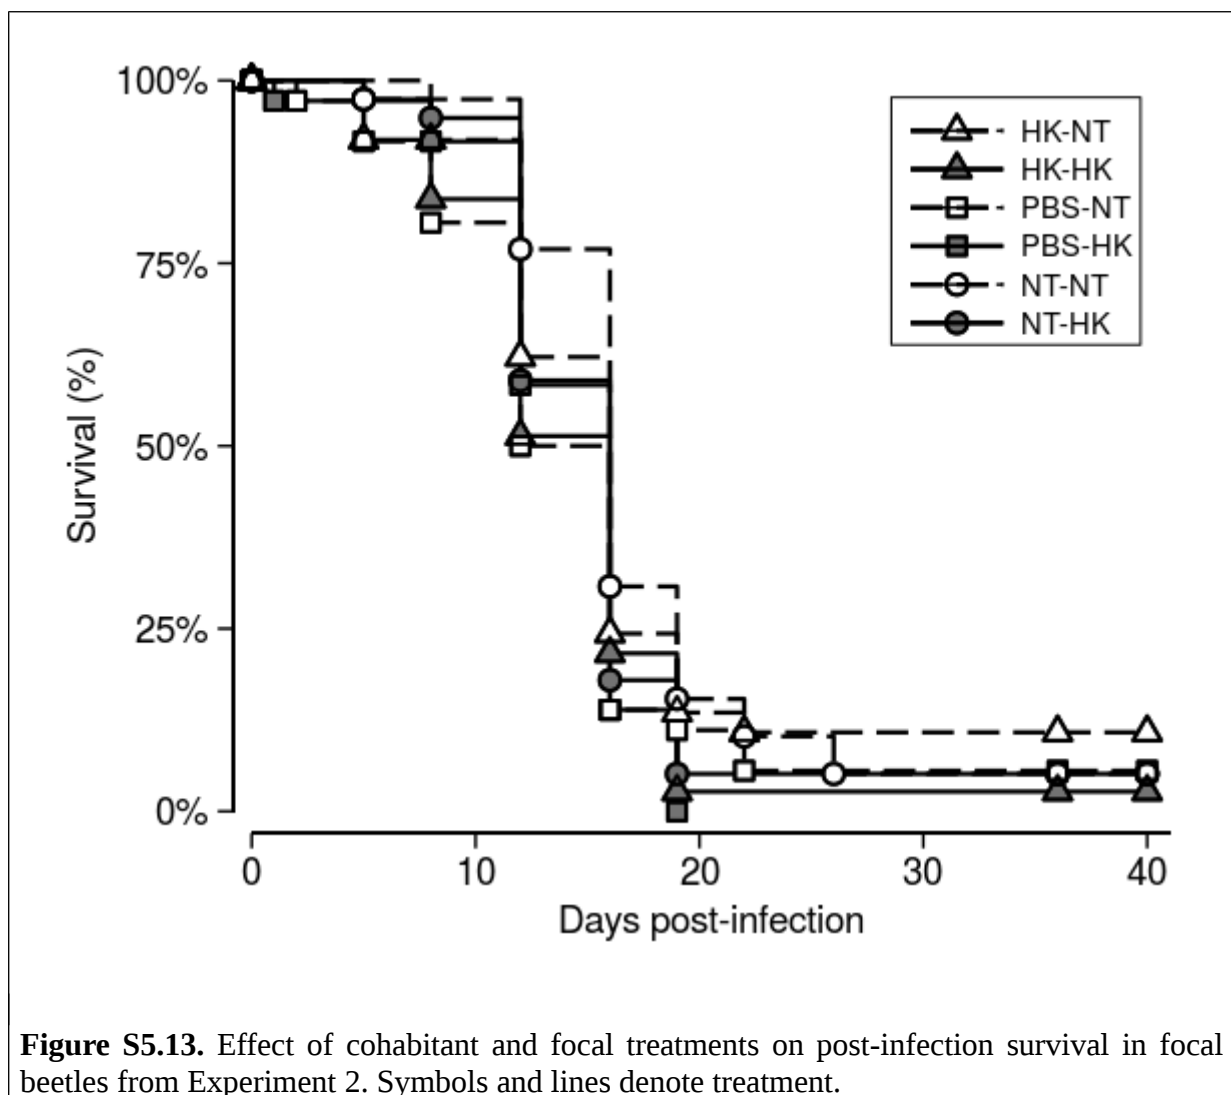

## S6. Extra data and analyses

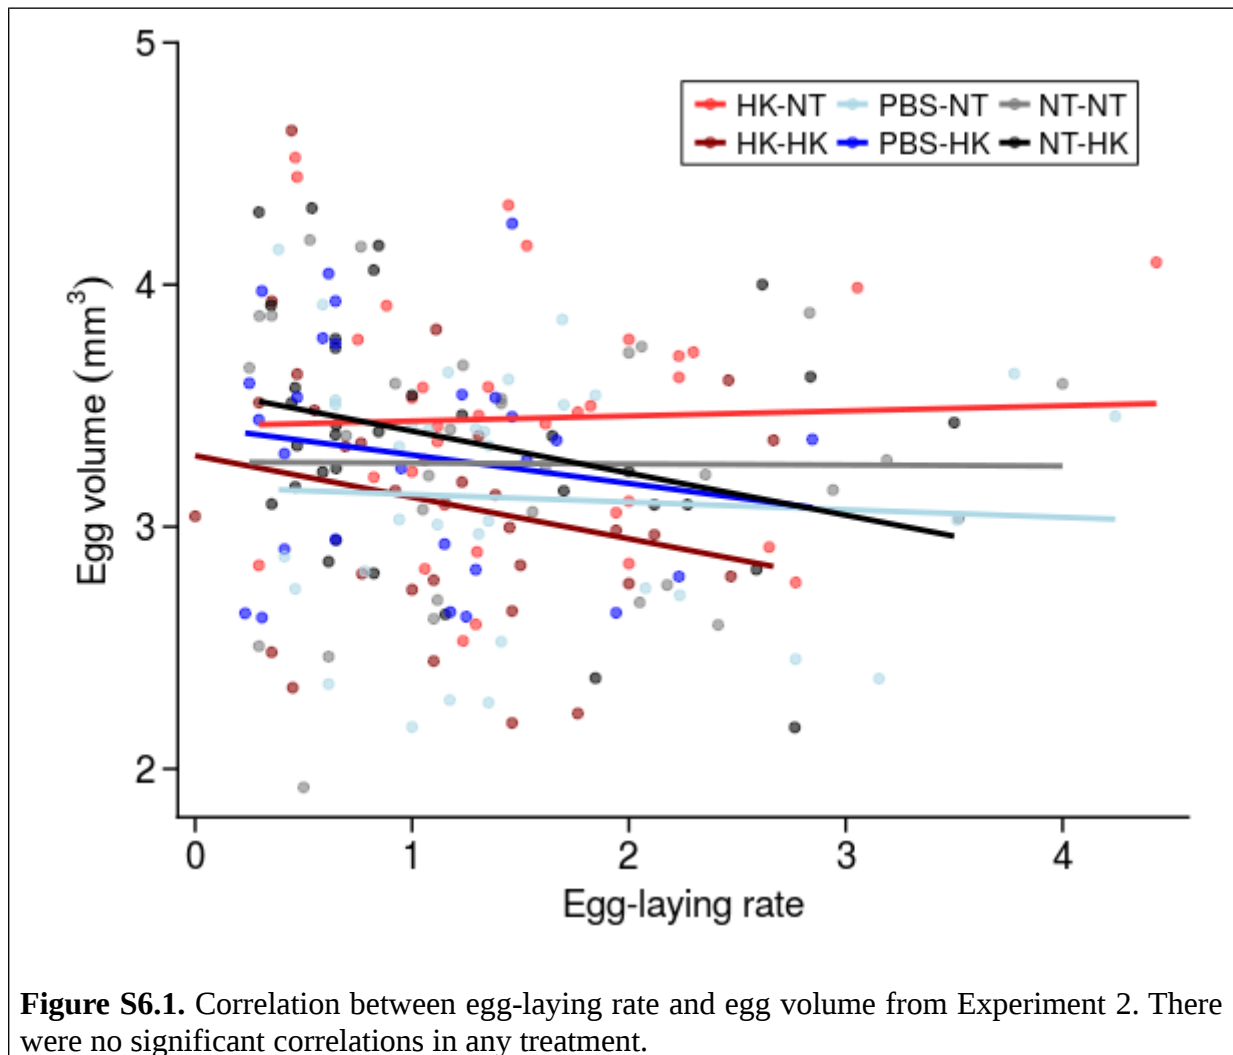



Changes in egg-laying rate and egg volume over time are depicted below, we do not analyse effects of time in our data, because over the 40 day period, the number of laying beetles decreases due to their deaths. The data is truncated and any analyses would be very difficult to interpret, but we include fig. S6.2 for general interest.

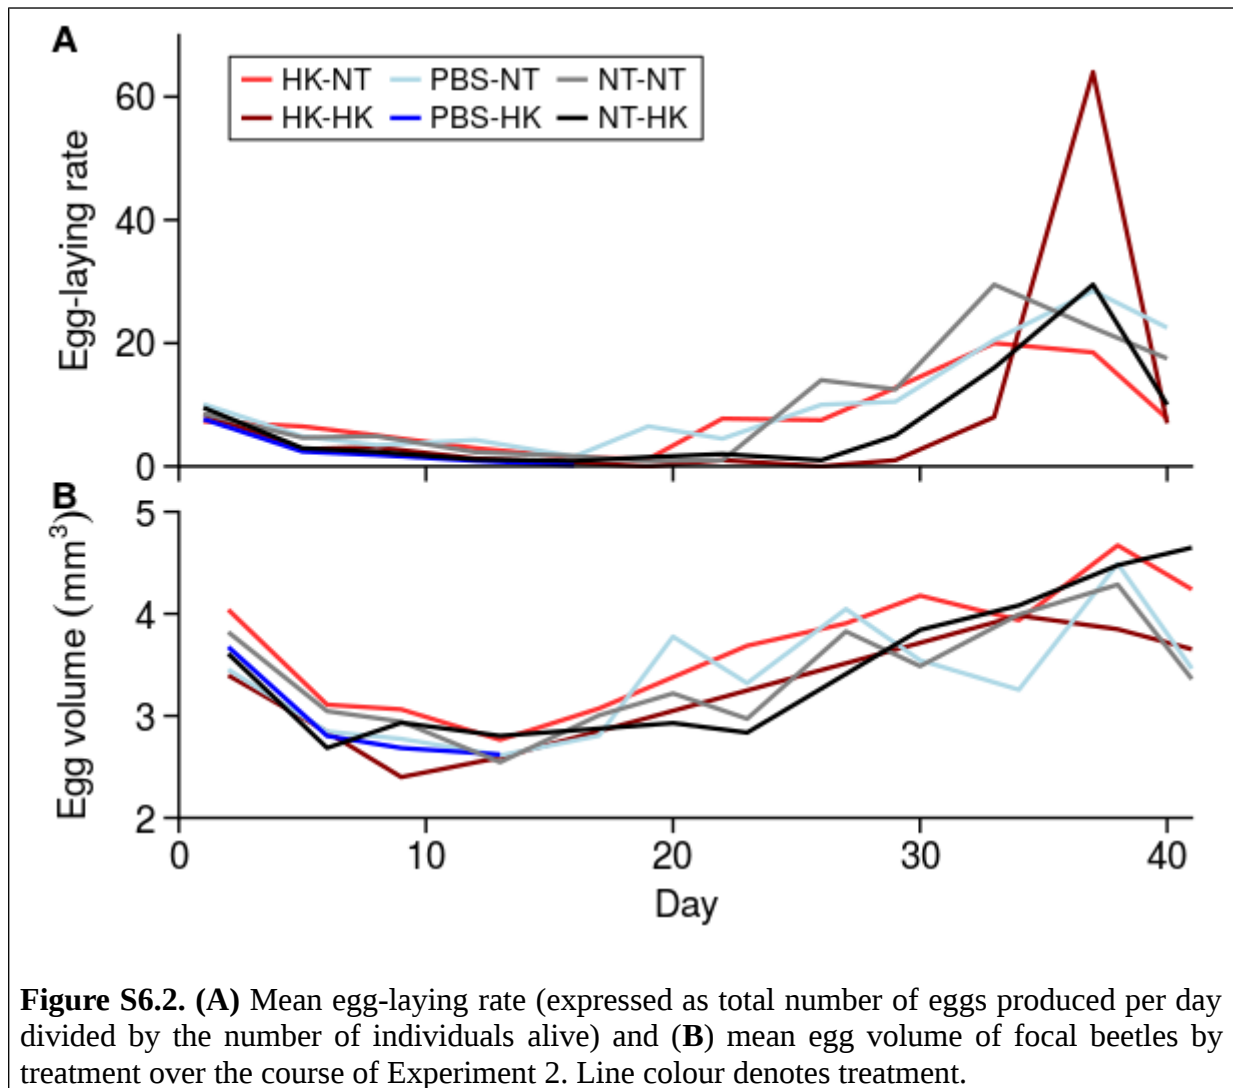

## References

1. Yezerski A, Cussatt G, Glick D, Evancho M, 2005. The effects of the presence of stored product pests on the microfauna of a flour community. *J. Appli. Microbiol.* **98**, 507–515.
2. Haine ER, Moret Y, Siva-Jothy MT, Rolff J. 2008. Antimicrobial defense and persistent infection in insects. *Science* **322**, 1257-1259.
3. Geissmann Q 2013. OpenCFU, a new free and open-source software to count cell colonies and other circular objects. *PLoS ONE* **8**, e54072.
4. Dobson AJ, Johnston PR, Vilcinskas A, Rolff J. 2012. Identification of immunological expressed sequence tags in the mealworm beetle *Tenebrio molitor*. *J. Ins. Physiol.*, **58**, 1556-1561.
5. Altincicek B, Knorr E, Vilcinskas A. 2008. Beetle immunity: Identification of immune-inducible genes from the model insect *Tribolium castaneum*. *Dev. Comp. Immunol.* **32**, 585-595.
6. Hurd H, Arme C. 1986. *Hymenolepis diminuta*: effect of metacestodes on production and viability of eggs in the intermediate host, *Tenebrio molitor*. *J. Invert. Pathol.* **47**, 225-230.
7. Sokoloff A. 1972. *The biology of Tribolium with special emphasis on genetic aspects*. Clarendon Press, Oxford.
